# Supplementary material for: A High-Resolution Earth Observations and Machine Learning-Based Approach to Forecast Waterborne Disease Risk in Post-Disaster Settings
Source: MDPI journal article supplement (doi:10.3390/cli10040048), 2022-03-22
Supplement: s1 [file s1]

**Supplementary Materials:**

Risk Level Classification

**Table S1.** Risk Level Classification for model A (Base Model).

| Risk level    | Precipitation anomalies<br>(mm/day)     | Temperature anomalies<br>(°C)                | Population densities<br>(count per km <sup>2</sup> ) | Wind swath of hurricane                                     |
|---------------|-----------------------------------------|----------------------------------------------|------------------------------------------------------|-------------------------------------------------------------|
| Very high     | 4 (rain anomaly $\geq 15$ )             | 4 (temp anomaly $> 2$ )                      | 4 (pop $\geq 1000$ )                                 | 4 ( $0 < \text{radius} \leq 50$ miles)                      |
| High          | 3 ( $5 \leq \text{rain anomaly} < 15$ ) | 3 ( $0.50 < \text{temp anomaly} \leq 2$ )    | 3 ( $500 \leq \text{pop} < 1000$ )                   | 3 ( $50 < \text{radius} \leq 100$ miles)                    |
| Moderate high | 2 ( $3 \leq \text{rain anomaly} < 5$ )  | 2 ( $0.25 < \text{temp anomaly} \leq 0.50$ ) | 2 ( $250 \leq \text{pop} < 500$ )                    | 2<br>( $100 < \text{radius} \leq 150$ miles)                |
| Low           | 1 ( $1 \leq \text{rain anomaly} < 3$ )  | 1 ( $0 < \text{temp anomaly} \leq 0.25$ )    | 1 ( $25 \leq \text{pop} < 250$ )                     | 1 ( $150 < \text{radius} \leq 200$ miles)                   |
| Very Low      | 0 (rain anomaly $< 1$ )                 | 0 (temp anomaly $\leq 0$ )                   | 0 ( $0 \leq \text{pop} < 25$ )                       | 0 (no area is designated as zero)<br>(radius $> 200$ miles) |
| Weightage     | 0.25                                    | 0.25                                         | 0.25                                                 | 0.25                                                        |

**Table S2.** Risk Level Classification for model B.

| Risk level    | Precipitation anomalies<br>(mm/day)     | Temperature anomalies (°C)                   | Extreme rainfall                   | Elevation                        | Population densities (count per km <sup>2</sup> ) | Wind speed                            |
|---------------|-----------------------------------------|----------------------------------------------|------------------------------------|----------------------------------|---------------------------------------------------|---------------------------------------|
| Very high     | 4 (rain anomaly $> 10$ )                | 4 (temp anomaly $> 0.65$ )                   | Rain $\geq 480$                    | 4 (Elv $\leq 25$ )               | 4 (pop $\geq 1000$ )                              | 4 ( $120 < \text{wind} \leq 160$ mph) |
| High          | 3 ( $7 < \text{rain anomaly} \leq 10$ ) | 3 ( $0.60 < \text{temp anomaly} \leq 0.65$ ) | 3 ( $360 \leq \text{rain} < 480$ ) | 3 ( $25 < \text{Elv} \leq 50$ )  | 3 ( $500 \leq \text{pop} < 1000$ )                | 3 ( $80 < \text{wind} \leq 120$ mph)  |
| Moderate high | 2 ( $3 < \text{rain anomaly} \leq 7$ )  | 2 ( $0.30 < \text{temp anomaly} \leq 0.60$ ) | 2 ( $240 \leq \text{rain} < 360$ ) | 2 ( $50 < \text{Elv} \leq 75$ )  | 2 ( $250 \leq \text{pop} < 500$ )                 | 2 ( $60 < \text{wind} \leq 80$ mph)   |
| Low           | 1 ( $0 < \text{rain anomaly} \leq 3$ )  | 1 ( $0 < \text{temp anomaly} \leq 0.30$ )    | 1 ( $120 \leq \text{rain} < 240$ ) | 1 ( $75 < \text{Elv} \leq 100$ ) | 1 ( $25 \leq \text{pop} < 250$ )                  | 1 ( $40 < \text{wind} \leq 60$ mph)   |
| Very Low      | 0 (rain anomaly $\leq 0$ )              | 0 (temp anomaly $\leq 0$ )                   | 0 (rain $< 120$ )                  | 0 (Elv $> 100$ )                 | 0 ( $0 \leq \text{pop} < 25$ )                    | 0 (wind $= 40$ mph)                   |
| Weightage     | 15%                                     | 10%                                          | 25%                                | 10%                              | 15%                                               | 25%                                   |

**Table S3.** Risk Level Classification for model A Plus.

| Risk level    | Precipitation anomalies (mm/day)  | Temperature anomalies (°C)             | Cloud height (m)                 | Building damage                | Cloud temperature (k)              | Population densities (count per km²) | Wind speed                 |
|---------------|-----------------------------------|----------------------------------------|----------------------------------|--------------------------------|------------------------------------|--------------------------------------|----------------------------|
| Very high     | 4 (rain anomaly $\geq 15$ )       | 4 (temp anomaly $> 2$ )                | 4 (Height $> 5450$ )             | 4 (HADR $> 0.11$ )             | 4 (cloud temp $> 126$ )            | 4 (pop $\geq 1000$ )                 | 4 (wind $> 18$ )           |
| High          | 3 (5 $\leq$ rain anomaly $< 15$ ) | 3 (0.50 $<$ temp anomaly $\leq 2$ )    | 3 (3500 $<$ Height $\leq 5450$ ) | 3 (0.08 $<$ HADR $\leq 0.11$ ) | 3 (100 $<$ cloud temp $\leq 126$ ) | 3 (500 $\leq$ pop $< 1000$ )         | 3 (10 $<$ wind $\leq 18$ ) |
| Moderate high | 2 (3 $\leq$ rain anomaly $< 5$ )  | 2 (0.25 $<$ temp anomaly $\leq 0.50$ ) | 2 (2000 $<$ Height $\leq 3500$ ) | 2 (0.04 $<$ HADR $\leq 0.08$ ) | 2 (50 $<$ cloud temp $\leq 100$ )  | 2 (250 $\leq$ pop $< 500$ )          | 2 (5 $<$ wind $\leq 10$ )  |
| Low           | 1 (1 $\leq$ rain anomaly $< 3$ )  | 1 (0 $<$ temp anomaly $\leq 0.25$ )    | 1 (500 $<$ Height $\leq 2000$ )  | 1 (0 $<$ HADR $\leq 0.04$ )    | 1 (5 $<$ cloud temp $\leq 50$ )    | 1 (25 $\leq$ pop $< 250$ )           | 1 (2 $<$ wind $\leq 5$ )   |
| Very Low      | 0 (rain anomaly $< 1$ )           | 0 (temp anomaly $\leq 0$ )             | 0 (Height $\leq 500$ )           | 0 (HADR $\leq 0$ )             | 0 (cloud temp $\leq 5$ )           | 0 (0 $\leq$ pop $< 25$ )             | 0 (wind $\leq 2$ )         |
| Weightage     | 15%                               | 10%                                    | 15%                              | 10%                            | 15%                                | 10%                                  | 25%                        |

**Table S4.** Risk Level Classification for model B Plus.

| Risk level    | Precipitation anomalies (mm/day)  | Temperature anomalies (°C)             | Extreme rainfall             | Elevation (m)             | Population densities (count per km²) | Wind speed                 | Building damage                | Cloud height (m)                 | Cloud temperature (k)              |
|---------------|-----------------------------------|----------------------------------------|------------------------------|---------------------------|--------------------------------------|----------------------------|--------------------------------|----------------------------------|------------------------------------|
| Very high     | 4 (rain anomaly $\geq 10$ )       | 4 (temp anomaly $\geq 0.65$ )          | Rain $\geq 480$              | 4 (Elv $\leq 25$ )        | 4 (pop $\geq 1000$ )                 | 4 (wind $> 18$ )           | 4 (HADR $\geq 0.11$ )          | 4 (Height $> 5450$ )             | 4 (cloud temp $> 126$ )            |
| High          | 3 (7 $\leq$ rain anomaly $< 10$ ) | 3 (0.60 $\leq$ temp anomaly $< 0.65$ ) | 3 (360 $\leq$ rain $< 480$ ) | 3 (25 $<$ Elv $\leq 50$ ) | 3 (500 $\leq$ pop $< 1000$ )         | 3 (10 $<$ wind $\leq 18$ ) | 3 (0.08 $\leq$ HADR $< 0.11$ ) | 3 (3500 $<$ Height $\leq 5450$ ) | 3 (100 $<$ cloud temp $\leq 126$ ) |
| Moderate high | 2 (3 $\leq$ rain anomaly $< 7$ )  | 2 (0.30 $\leq$ temp anomaly $< 0.60$ ) | 2 (240 $\leq$ rain $< 360$ ) | 2 (50 $<$ Elv $\leq 75$ ) | 2 (250 $\leq$ pop $< 500$ )          | 2 (5 $<$ wind $\leq 10$ )  | 2 (0.04 $\leq$ HADR $< 0.08$ ) | 2 (2000 $<$ Height $\leq 3500$ ) | 2 (50 $<$ cloud temp $\leq 100$ )  |

| Risk level | Precipitation anomalies (mm/day) | Temperature anomalies (°C)  | Extreme rainfall     | Elevation (m)      | Population densities (count per km <sup>2</sup> ) | Wind speed       | Building damage     | Cloud height (m)        | Cloud temperature (k)   |
|------------|----------------------------------|-----------------------------|----------------------|--------------------|---------------------------------------------------|------------------|---------------------|-------------------------|-------------------------|
| Low        | 1 (0 < rain anomaly < 3)         | 1 (0 < temp anomaly < 0.30) | 1 (120 ≤ rain < 240) | 1 (75 < Elv ≤ 100) | 1 (25 ≤ pop < 250)                                | 1 (2 < wind ≤ 5) | 1 (0 < HADR < 0.04) | 1 (500 < Height ≤ 2000) | 1 (5 < cloud temp ≤ 50) |
| Very Low   | 0 (rain anomaly ≤ 0)             | 0 (temp anomaly ≤ 0)        | 0 (rain < 120)       | 0 (Elv > 100)      | 0 (0 ≤ pop < 25)                                  | 0 (wind ≤ 2)     | 0 (HADR ≤ 0)        | 0 (Height ≤ 500)        | 0 (cloud temp ≤ 5)      |
| Weightage  | 10%                              | 5%                          | 15%                  | 12.5%              | 10%                                               | 12.5%            | 10%                 | 12.5%                   | 12.5%                   |
